# Supplementary material
Source: Springer Nature journal article supplement (https://www.springermedizin.de/resource/supplementary/12957_2011_803_MOESM2_ESM.pdf/9565912)

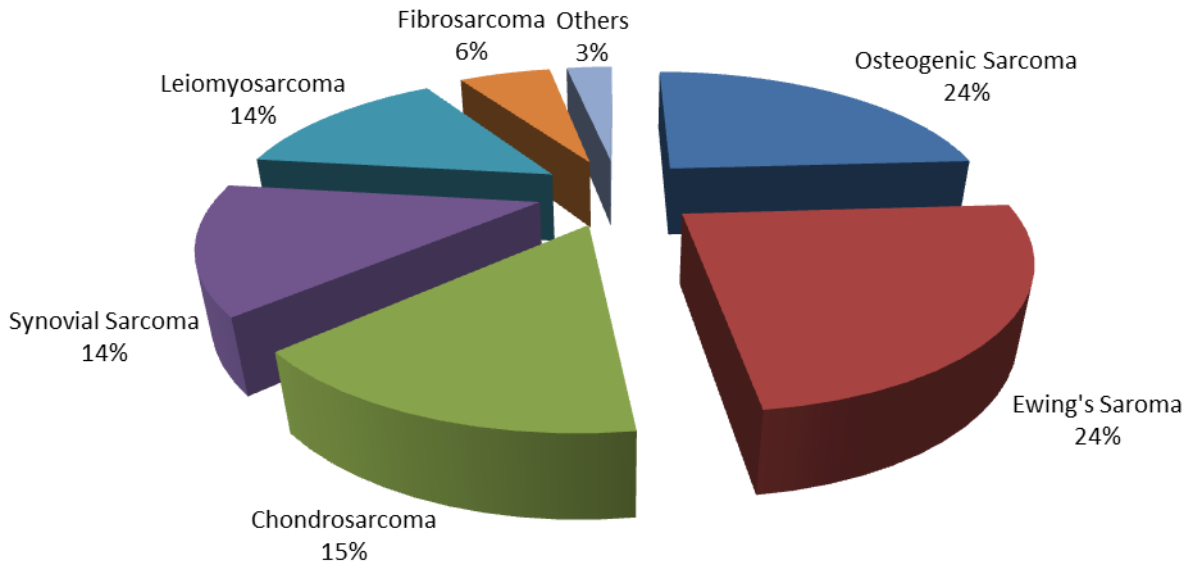

Supplement: MOESM2 [file 9565912]
